# Supplementary material for: Trait-Specific Assessment and Classification of Kharif Onion (Allium cepa L.) Varieties for Enhanced Bulb Yield and Quality
Source: Research Square preprint supplement (doi:10.21203/rs.3.rs-7103859/v1), 2025-07-23
Supplement: Supplementary file 1 [file 920eb615b947e72c33e6dc56.docx]

**Trait-Specific Assessment and Classification of *Kharif* Onion (*Allium cepa* L.) Varieties for Enhanced Bulb Yield and Quality**

**Amar Jeet Gupta*, Supriya Kaldate, Sairam Volaguthala, Kalyani Gorrepati, Priya Thigale, Vijay Mahajan**

ICAR-Directorate of Onion and Garlic Research (ICAR-DOGR), Pune, Maharashtra, India

***Corresponding author email:** [**guptaaj75@yahoo.co.in**](mailto:guptaaj75@yahoo.co.in)

Weather data of *kharif* season 2023-2024

| **Month** | **Temp. (ᵒC) (Max)** | **Temp.**  **(ᵒC) (Min)** | **RH (%)**  **8.45 AM** | **RH (%)**  **2.45 PM** | **Velocity (Km/Hr.)** | **Sunshine (Hr.)** | **Rain (mm)** | **Evaporation**  **(mm)** |
| --- | --- | --- | --- | --- | --- | --- | --- | --- |
| **2023** | | | | | | | | |
| June | 32.74 | 22.13 | 76.34 | 62.52 | 9.34 | 6.89 | 1.96 | 5.6 |
| July | 27.93 | 21.75 | 87.9 | 84 | 7.6 | 1.34 | 4.06 | 1.55 |
| August | 28.07 | 21.8 | 86.6 | 77.07 | 7.63 | 5.02 | 0.75 | 1.81 |
| September | 29.27 | 21.44 | 88.03 | 75 | 5.74 | 4.77 | 7.28 | 2.08 |
| October | 32.84 | 20.04 | 78.55 | 59.48 | 2.21 | 7.11 | 1.24 | 2.96 |
| November | 31.23 | 17.08 | 65.09 | 53.67 | 2.43 | 6.84 | 0.44 | 3.54 |
| **2024** | | | | | | | | |
| June | 32.97 | 23.07 | 83.45 | 68.23 | 7.61 | 6.81 | 17.63 | 4.55 |
| July | 28.15 | 22.78 | 90.45 | 81.42 | 7.73 | 0.89 | 9.90 | 1.30 |
| August | 28.72 | 22.43 | 90.10 | 79.68 | 9.33 | 3.13 | 9.85 | 1.45 |
| September | 29.75 | 21.55 | 86.57 | 72.00 | 5.00 | 4.67 | 2.24 | 2.19 |
| October | 32.50 | 21.36 | 85.65 | 65.68 | 3.34 | 7.10 | 2.50 | 2.84 |
| November | 31.24 | 15.30 | 75.67 | 62.20 | 2.45 | 8.83 | 0.00 | 4.18 |
